# Supplementary material
Source: HighWire-hosted journal article supplement (https://rmdopen.bmj.com/content/3/2/e000544)
Supplement: inline-supplementary-material-1 [file inline-supplementary-material-1.docx]

**Online supplementary table 1:** Patient characteristics in patients with and without CADa

|  | **CAD (n=55)** | **no CAD (n=28)** | **p-valueb** |
| --- | --- | --- | --- |
| Age, years | 64±6.9 | 54±7.5 | <0.01 |
| [Women, n(%)](http://onlinelibrary.wiley.com/doi/10.1002/art.39114/full#art39114-note-0005) | 33 (60.0) | 17 (60.7) | 0.95 |
| Disease duration, years, median (IQR) | 17  (6.5-28.3) | 16  (9.0-22.8) | 0.77 |
| BMI, kg/m2 | 25.3±3.0 | 25.1±3.2 | 0.86 |
| Waist circumference, cm | 91.9±11.3 | 89.3±9.4 | 0.30 |
| Systolic BP, mm Hg | 148±18 | 138±20 | 0.03 |
| Diastolic BP, mm Hg | 86±9 | 81±10 | 0.03 |
| Hypertension, n (%) | 32 (58.2) | 8 (28.6) | 0.01 |
| Diabetes mellitus, n (%) | 5(9.1) | 1(3.6) | 0.36 |
| Smoking, n(%) | 9 (16.4) | 7 (25.0) | 0.35 |
| Family history, n (%) | 8 (14.5) | 4 (14.3) | 0.98 |
| Angina, n(%) | 11 (20.0) | 7 (25.0) | 0.60 |
| Hyperlipidemia, n(%) | 35 (66.3) | 19 (67.9) | 0.71 |
| **Lipids** |  |  |  |
| Total cholesterol, mmol/l | 6.44±1.15 | 6.45±0.92 | 0.96 |
| HDL cholesterol, mmol/l | 1.69±0.51 | 1.79±0.58 | 0.96 |
| LDL cholesterol, mmol/l | 4.09±1.07 | 3.98±0.93 | 0.59 |
| Triglycerides, mmol/l, median (IQR) | 1.2 (0.7-1.6) | 1.3 (0.7-1.9) | 0.86 |
| **Medications** |  |  |  |
| DMARDs | 32(58.2) | 16 (57.1) | 0.92 |
| Biologic DMARDs | 14 (25.5) | 12 (42.9) | 0.08 |
| **Inflammation-markers** |  |  |  |
| ESR, mm/h | 15.36±9.09 | 12.07±8.98 | 0.12 |
| CRP, median (IQR) | 2 (1.0-4.0) | 2 (1.0-6.0) | 0.92 |

aData are expressed as mean±SD, unless otherwise indicated. CAD: coronary artery disease, IQR: interquartile range, BMI: body mass index, BP: blood pressure, Hypertension (≥140mm Hg systolic), CVD: cardiovascular disease, HDL: high-density lipoprotein, LDL: Low-density lipoprotein, DMARDS: Disease modifying anti-rheumatic drugs, ESR: erythrocyte sedimentation rate, CRP: c-reactive protein

bData were compared using analysis of variance
